# Supplementary material for: Self-Stigma and Empowerment in Combined-CMHA and Consumer-Run Services: Two Controlled Trials
Source: Atypon-hosted journal article supplement (doi:10.1176/appi.ps.201200490), 2013-06-17
Supplement: 990_ds001.pdf [file 990_ds001.pdf]

 


Psychiatry Online
